# Supplementary figures and images for: Noncovalent interaction mechanism and functional properties of flavonoid glycoside-β-lactoglobulin complexes
Source: Royal Society of Chemistry journal article supplement (doi:10.1039/d2fo02791g), 2023-01-01

Supplement Figure 1 The plots of the surface hydrophobicity

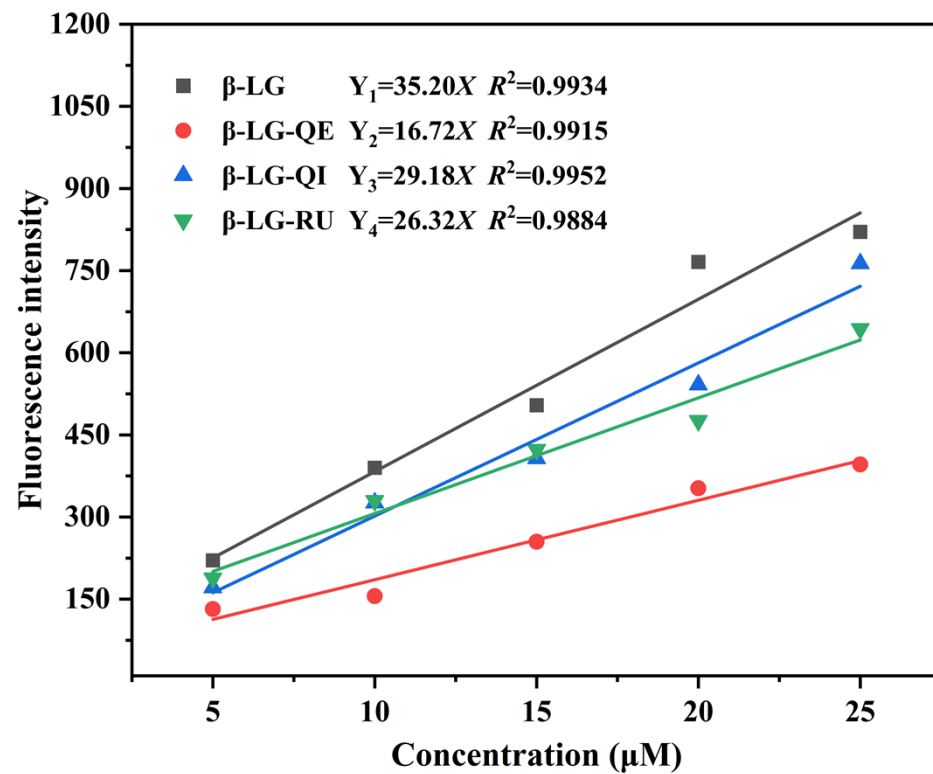

Supplement: d2fo02791g1.pdf [file d2fo02791g1.pdf]
